# Supplementary material for: Long-Term Outcomes After Extra-Levator Versus Conventional Abdominoperineal Excision for Low Rectal Cancer
Source: Research Square preprint supplement (doi:10.21203/rs.3.rs-1095645/v1), 2021-11-29
Supplement: Supplementary file 1 [file 141e0304e3285c35c76131a9.docx]

Supplementary_Table_6. Multivariate analysis for affecting LRFS in patients with low rectal cancer

| Influencing factors | B | SE | *Wald* | Hazard ratio(95pre cent c.i.) | *P* value |
| --- | --- | --- | --- | --- | --- |
| Pathological T stage | 0.858 | 0.336 | 6.528 | 1.860(1.221, 4.557) | 0.046* |
| Pathological N+ | 0.278 | 0.520 | 0.285 | 1.320(0.477, 3.656) | 0.593 |
| Operation Type | 0.974 | 0.480 | 4.113 | 2.648(1.033, 6.786) | 0.090 |
| Nerve invasion | 0.210 | 0.468 | 0.202 | 1.234(0.494, 3.085) | 0.653 |
| Tumor differentiation | 0.399 | 0.688 | 0.336 | 1.490(0.387, 5.745) | 0.562 |
| Positive CRM | 1.554 | 0.532 | 8.548 | 2.648(1.084, 6.866) | 0.049* |
