# Supplementary material for: Long-Term Outcomes After Extra-Levator Versus Conventional Abdominoperineal Excision for Low Rectal Cancer
Source: Research Square preprint supplement (doi:10.21203/rs.3.rs-1095645/v1), 2021-11-29
Supplement: Supplementary file 2 [file 46d466bc4834932abc8f86ee.docx]

Supplementary_Table_4. Multivariate analysis for affecting PFS in patients with low rectal cancer

| Influencing factors | B | SE | *Wald* | Hazard ratio(95pre cent c.i.) | *P* value |
| --- | --- | --- | --- | --- | --- |
| Operation Type | 0.981 | 0.301 | 10.629 | 2.730(1.506, 4.984) | 0.001* |
| Positive lymph node ratio | 0.051 | 0.402 | 0.016 | 1.052(0.479, 2.311) | 0.969 |
| Pathological T stage | 0.508 | 0.213 | 5.679 | 1.661(1.094, 2.522) | 0.091 |
| Pathological N stage | 0.514 | 0.324 | 2.512 | 1.865(0.886, 3.154) | 0.045* |
| Lymphovascular invasion | 0.633 | 0.295 | 4.607 | 1.882(1.057, 3.354) | 0.048* |
| Nerve invasion | 0.281 | 0.363 | 0.601 | 1.325(0.650, 2.699) | 0.583 |
| Positive CRM | 1.170 | 0.473 | 6.124 | 3.233(1.276, 8.144) | 0.249 |
